# Supplementary material
Source: Research Square preprint supplement (doi:10.21203/rs.3.rs-9696135/v1)
Supplement: Supplementary file 2 [file fbeaa3f0f3ad16ced99d4e8c.xlsx]

## Sheet: Included
Meta-Analysis?	Studies Included
	Abdalla, Mohamed, Astley Hastings, Kun Cheng, Qian Yue, Dave Chadwick, Mikk Espenberg, Jaak Truu, Robert M. Rees, and Pete Smith. 2019. “A Critical Review of the Impacts of Cover Crops on Nitrogen Leaching, Net Greenhouse Gas Balance and Crop Productivity.” Global Change Biology 25 (8): 2530–43. https://doi.org/10.1111/gcb.14644.
*	Badgley, Catherine, Jeremy Moghtader, Eileen Quintero, Emily Zakem, M. Jahi Chappell, Katia Avilés-Vázquez, Andrea Samulon, and Ivette Perfecto. 2007. “Organic Agriculture and the Global Food Supply.” Renewable Agriculture and Food Systems 22 (2): 86–108. https://doi.org/10.1017/S1742170507001640.
	Ball, B. C., M. F. O’Sullivan, and R. W. Lang. 1985. “Cultivation and Nitrogen Requirement for Winter Barley as Assessed from a Reduced-Tillage Experiment on a Brown Forest Soil.” Soil and Tillage Research 6 (2): 95–109. https://doi.org/10.1016/0167-1987(85)90009-1.
	Bilsborrow, Paul, Julia Cooper, Catherine Tétard-Jones, Dominika Średnicka-Tober, Marcin Barański, Mick Eyre, Christoph Schmidt, et al. 2013. “The Effect of Organic and Conventional Management on the Yield and Quality of Wheat Grown in a Long-Term Field Trial.” European Journal of Agronomy 51 (November):71–80. https://doi.org/10.1016/j.eja.2013.06.003.
	Campbell, D. J., J. W. Dickson, B. C. Ball, and R. Hunter. 1986. “Controlled Seedbed Traffic after Ploughing or Direct Drilling under Winter Barley in Scotland, 1980–1984.” Soil and Tillage Research, Reduced Tillage - Rational Use in Sustained Production, III, 8 (November):3–28. https://doi.org/10.1016/0167-1987(86)90320-X.
	Cannell, R.Q., Christian, D.G., Henderson, F.K.G., 1986. A study of mole drainage with simplified cultivations for autumn-sown crops on a clay soil. IV. A comparison of direct drilling and mouldboard ploughing on drained and undrained land on root and shoot growth, nutrient uptake and yield. Soil Tillage Res. 7, 251-272.
	Catt, J.A., K.R. Howse, D.G. Christian, P.W. Lane, G.L. Harris, and M.J. Goss. 1998. “Strategies to Decrease Nitrate Leaching in the Brimstone Farm Experiment, Oxfordshire, UK, 1988–1993: The Effects of Winter Cover Crops and Unfertilised Grass Leys.” Plant and Soil 203 (1): 57–69. https://doi.org/10.1023/A:1004389426718.
*	CE. 2024. “Conservation Evidence - Site.” Conservation Evidence. 2024. https://www.conservationevidence.com/.
	Christian, D. G., and E. T. G. Bacon. 1990. “A Long-Term Comparison of Ploughing, Tine Cultivation and Direct Drilling on the Growth and Yield of Winter Cereals and Oilseed Rape on Clayey and Silty Soils.” Soil and Tillage Research 18 (4): 311–31. https://doi.org/10.1016/0167-1987(90)90117-V.
*	Cui, Yufei, Weiwei Zhang, Yun Zhang, Xinmei Liu, Ye Zhang, Xiaoying Zheng, Ji Luo, and Junliang Zou. 2022. “Effects of No-till on Upland Crop Yield and Soil Organic Carbon: A Global Meta-Analysis.” Plant and Soil, December. https://doi.org/10.1007/s11104-022-05854-y.
	Gabriel, Doreen, Steven M. Sait, William E. Kunin, and Tim G. Benton. 2013. “Food Production vs. Biodiversity: Comparing Organic and Conventional Agriculture.” Journal of Applied Ecology 50 (2): 355–64. https://doi.org/10.1111/1365-2664.12035.
	Giannitsopoulos, M. L., P. J. Burgess, and R. J. Rickson. 2019. “Effects of Conservation Tillage Systems on Soil Physical Changes and Crop Yields in a Wheat–Oilseed Rape Rotation.” Journal of Soil and Water Conservation 74 (3): 247–58. https://doi.org/10.2489/jswc.74.3.247.
	Jenkinson, D. S., N. J. Bradbury, and K. Coleman. 1994. “How the Rothamsted Classical Experiments Have Been Used to Develop and Test Models for the Turnover of Carbon and Nitrogen in Soil.” In , edited by A. E. Johnston and R. A. Leigh, 117–38. CABI International, Wallingford, Oxon (CABI). https://repository.rothamsted.ac.uk/item/870q9/how-the-rothamsted-classical-experiments-have-been-used-to-de…
	Lillywhite, R., Chandler, D., Grant, W., Lewis, K., Firth, C., Schmutz, U., and Halpin, D. (2007). Environmental Footprint and Sustainability of Horticulture (including Potatoes) – A Comparison with other Agricultural Sectors. Final report produced for the Department for Environment, Food and Rural Affairs. University of Warwick
	Linzell, Brigitte S., and D. S. Madge. 1986. “Effects of Pesticides and Fertilizer on Invertebrate Populations of Grass and Wheat Plots in Kent in Relation to Productivity and Yield.” Grass and Forage Science 41 (June):159–74. https://doi.org/10.1111/j.1365-2494.1986.tb01800.x.
	McGRATH, P. F., and J. S. Bale. 1990. “The Effects of Sowing Date and Choice of Insecticide on Cereal Aphids and Barley Yellow Dwarf Virus Epidemiology in Northern England.” Annals of Applied Biology 117 (1): 31–43. https://doi.org/10.1111/j.1744-7348.1990.tb04192.x.
	Newton, A. C., D. C. Guy, A. G. Bengough, D. C. Gordon, B. M. McKenzie, B. Sun, T. A. Valentine, and P. D. Hallett. 2012. “Soil Tillage Effects on the Efficacy of Cultivars and Their Mixtures in Winter Barley.” Field Crops Research 128 (March):91–100. https://doi.org/10.1016/j.fcr.2011.12.004.
*	Pittelkow, Cameron M., Xinqiang Liang, Bruce A. Linquist, Kees Jan van Groenigen, Juhwan Lee, Mark E. Lundy, Natasja van Gestel, Johan Six, Rodney T. Venterea, and Chris van Kessel. 2015. “Productivity Limits and Potentials of the Principles of Conservation Agriculture.” Nature 517 (7534): 365–68. https://doi.org/10.1038/nature13809.
*	Poore, J., and T. Nemecek. 2018. “Reducing Food’s Environmental Impacts through Producers and Consumers.” Science 360 (6392). https://ora.ox.ac.uk/objects/uuid:b0b53649-5e93-4415-bf07-6b0b1227172f.
	Quinton, J.n., and J.a. Catt. 2004. “The Effects of Minimal Tillage and Contour Cultivation on Surface Runoff, Soil Loss and Crop Yield in the Long-Term Woburn Erosion Reference Experiment on Sandy Soil at Woburn, England.” Soil Use and Management 20 (3): 343–49. https://doi.org/10.1111/j.1475-2743.2004.tb00379.x.
	Rahn, C. (Clive), G. D. Bending, Robert Lillywhite, and Mary K. Turner. 2009. “Co-Incorporation of Biodegradable Wastes with Crop Residues to Reduce Nitrate Pollution of Groundwater and Decrease Waste Disposal to Landfill.” Soil Use and Management Vol.25 (No.2): 113–23.
	Sharma, R. B. 1985. “Plant-Water Relations, Crop Growth and Grain Yield of Spring Barley in Relation to Tillage Methods.” Soil and Tillage Research 6 (2): 111–21. https://doi.org/10.1016/0167-1987(85)90010-8.
*	Smith, Laurence G., Guy J. D. Kirk, Philip J. Jones, and Adrian G. Williams. 2019. “The Greenhouse Gas Impacts of Converting Food Production in England and Wales to Organic Methods.” Nature Communications 10 (1): 4641. https://doi.org/10.1038/s41467-019-12622-7.
	Soane, B. D, and B. C Ball. 1998. “Review of Management and Conduct of Long-Term Tillage Studies with Special Reference to a 25-Yr Experiment on Barley in Scotland.” Soil and Tillage Research 45 (1): 17–37. https://doi.org/10.1016/S0167-1987(97)00070-6.
*	Su, Yang, Benoit Gabrielle, and David Makowski. 2021. “A Global Dataset for Crop Production under Conventional Tillage and No Tillage Systems.” Scientific Data 8 (1): 33. https://doi.org/10.1038/s41597-021-00817-x.
*	Thapa, Resham, Steven B. Mirsky, and Katherine L. Tully. 2018. “Cover Crops Reduce Nitrate Leaching in Agroecosystems:A Global Meta-Analysis.” Journal of Environmental Quality 47 (6): 1400–1411. https://doi.org/10.2134/jeq2018.03.0107.
	Trewavas, Anthony. 2004. “A Critical Assessment of Organic Farming-and-Food Assertions with Particular Respect to the UK and the Potential Environmental Benefits of No-till Agriculture.” Crop Protection 23 (9): 757–81. https://doi.org/10.1016/j.cropro.2004.01.009.
	Tzilivakis, J., Warner, D. J., May, M., Lewis, K. A., & Jaggard, K. (2005). An assessment of the energy inputs and greenhouse gas emissions in sugar beet (Beta vulgaris) production in the UK. Agricultural Systems, 85(2), 101-119.
	Williams, A. G., Audsley, E., & Sandars, D. L. (2010). Environmental burdens of producing bread wheat, oilseed rape and potatoes in England and Wales using simulation and system modelling. International Journal of Life Cycle Assessment 15, 855-868.
	Williams, A. G., Audsley, E., & Sandars, D.L. (2006) Determining the environmental burdens and resource use in the production of agricultural and horticultural commodities. Main Report. Defra Research Project IS0205. Cranfield University, Bedford.
	Wiltshire, J., Wynn, S., Clarke, J., Chambers, B., Cottrill, B., Drakes, D., ... & Foster, C. (2009). Scenario building to test and inform the development of a BSI method for assessing greenhouse gas emissions from food. Defra, London.

## Sheet: Excluded
	Study Inclusion Criteria
	Only UK-based studies relating to the yield effects of the following practices are included: organic, no-till, cover crops, crop residue application, insecticide management
	1. Peer reviewed journals, PhD thesis, ISO compliant reports, databases or proceedings
	2. Report results not presented in another study
	3. Assess feed products for animal agriculture (cereals, sugarbeet, canola, beans, peas, maize)
	4. Includes values clearly related to the UK
	5. Includes yields between BOTH conventional and conservation practices
	6. Data is accessible
	Studies Excluded
	Study	Criteria Not Met	Note	Full Reference
	de la Cruz et al (2023)	6	Data requested, no response	Cruz, Vera Ysabel V. de la, Tantriani, Weiguo Cheng, and Keitaro Tawaraya. 2023. “Yield Gap between Organic and Conventional Farming Systems across Climate Types and Sub-Types: A Meta-Analysis.” Agricultural Systems 211 (October):103732. https://doi.org/10.1016/j.agsy.2023.103732.
	Knapp et al (2018)	2, 4	The UK-relevant data are already included	Knapp, Samuel, and Marcel G. A. van der Heijden. 2018. “A Global Meta-Analysis of Yield Stability in Organic and Conservation Agriculture.” Nature Communications 9 (1): 3632. https://doi.org/10.1038/s41467-018-05956-1.
	Seufert et al (2012)	4		Seufert, Verena, Navin Ramankutty, and Jonathan A. Foley. 2012. “Comparing the Yields of Organic and Conventional Agriculture.” Nature 485 (7397): 229–32. https://doi.org/10.1038/nature11069.
	Kirchmann (2019)	4		Kirchmann, Holger. 2019. “Why Organic Farming Is Not the Way Forward.” Outlook on Agriculture 48 (1): 22–27. https://doi.org/10.1177/0030727019831702.
	de Ponti et al (2012)	6		Ponti, Tomek de, Bert Rijk, and Martin K. van Ittersum. 2012. “The Crop Yield Gap between Organic and Conventional Agriculture.” Agricultural Systems 108 (April):1–9. https://doi.org/10.1016/j.agsy.2011.12.004.
	Pittelkow et al (2015)	2	Same data as Pittelkow et al (2014)	Pittelkow, Cameron M., Bruce A. Linquist, Mark E. Lundy, Xinqiang Liang, Kees Jan van Groenigen, Juhwan Lee, Natasja van Gestel, Johan Six, Rodney T. Venterea, and Chris van Kessel. 2015. “When Does No-till Yield More? A Global Meta-Analysis.” Field Crops Research 183 (November):156–68. https://doi.org/10.1016/j.fcr.2015.07.020.
	Shakoor et al (2021)	6	Data requested, no response	Shakoor, Awais, Muhammad Shahbaz, Taimoor Hassan Farooq, Najam E. Sahar, Sher Muhammad Shahzad, Muhammad Mohsin Altaf, and Muhammad Ashraf. 2021. “A Global Meta-Analysis of Greenhouse Gases Emission and Crop Yield under No-Tillage as Compared to Conventional Tillage.” Science of The Total Environment 750 (January):142299. https://doi.org/10.1016/j.scitotenv.2020.142299.
	Cooper et al (2016)	6	Data requested, no response	Cooper, Julia, Marcin Baranski, Gavin Stewart, Majimcha Nobel-de Lange, Paolo Bàrberi, Andreas Fließbach, Josephine Peigné, et al. 2016. “Shallow Non-Inversion Tillage in Organic Farming Maintains Crop Yields and Increases Soil C Stocks: A Meta-Analysis.” Agronomy for Sustainable Development 36 (1): 22. https://doi.org/10.1007/s13593-016-0354-1.
	Francaviglia et al (2020)	4		Francaviglia, Rosa, Jorge Álvaro-Fuentes, Claudia Di Bene, Lingtong Gai, Kristiina Regina, and Eila Turtola. 2020. “Diversification and Management Practices in Selected European Regions. A Data Analysis of Arable Crops Production.” Agronomy 10 (2): 297. https://doi.org/10.3390/agronomy10020297.
	Han et al (2017)	4		Han, Zhen, M. Todd Walter, and Laurie E. Drinkwater. 2017. “N2O Emissions from Grain Cropping Systems: A Meta-Analysis of the Impacts of Fertilizer-Based and Ecologically-Based Nutrient Management Strategies.” Nutrient Cycling in Agroecosystems 107 (3): 335–55. https://doi.org/10.1007/s10705-017-9836-z.
	Bulan et al (2015)	4		Bulan, Mary T. Saunders, David E. Stoltenberg, and Joshua L. Posner. 2015. “Buckwheat Species as Summer Cover Crops for Weed Suppression in No-Tillage Vegetable Cropping Systems.” Weed Science 63 (3): 690–702. https://doi.org/10.1614/WS-D-14-00088.1.
	Mahal et al (2018)	4		Mahal, Navreet K., Michael J. Castellano, and Fernando E. Miguez. 2018. “Conservation Agriculture Practices Increase Potentially Mineralizable Nitrogen: A Meta-Analysis.” Soil Science Society of America Journal 82 (5): 1270–78. https://doi.org/10.2136/sssaj2017.07.0245.
	Marcillo et al (2017)	4		Marcillo, G. S., and F. E. Miguez. 2017. “Corn Yield Response to Winter Cover Crops: An Updated Meta-Analysis.” Journal of Soil and Water Conservation 72 (3): 226–39. https://doi.org/10.2489/jswc.72.3.226.
	Quemada et al (2013)	4		Quemada, M., M. Baranski, M. N. J. Nobel-de Lange, A. Vallejo, and J. M. Cooper. 2013. “Meta-Analysis of Strategies to Control Nitrate Leaching in Irrigated Agricultural Systems and Their Effects on Crop Yield.” Agriculture, Ecosystems & Environment 174 (July):1–10. https://doi.org/10.1016/j.agee.2013.04.018.
	Tonitto et al (2006)	4		Tonitto, C., M. B. David, and L. E. Drinkwater. 2006. “Replacing Bare Fallows with Cover Crops in Fertilizer-Intensive Cropping Systems: A Meta-Analysis of Crop Yield and N Dynamics.” Agriculture, Ecosystems & Environment 112 (1): 58–72. https://doi.org/10.1016/j.agee.2005.07.003.
	Doring et al (2015)	5	Data relates to yield variability rather than yield	Döring, Thomas F., Paolo Annicchiarico, Sarah Clarke, Zoë Haigh, Hannah E. Jones, Helen Pearce, John Snape, Jiasui Zhan, and Martin S. Wolfe. 2015. “Comparative Analysis of Performance and Stability among Composite Cross Populations, Variety Mixtures and Pure Lines of Winter Wheat in Organic and Conventional Cropping Systems.” Field Crops Research 183 (November):235–45. https://doi.org/10.1016/j.…
	Stanhill (1990)	4		Stanhill, G. 1990. “The Comparative Productivity of Organic Agriculture.” Agriculture, Ecosystems & Environment 30 (1): 1–26. https://doi.org/10.1016/0167-8809(90)90179-H.
	Hossard et al (2016)	6	Appendix links not functional	Hossard, Laure, David W. Archer, Michel Bertrand, Caroline Colnenne-David, Philippe Debaeke, Maria Ernfors, Marie-Helene Jeuffroy, et al. 2016. “A Meta-Analysis of Maize and Wheat Yields in Low-Input vs. Conventional and Organic Systems.” Agronomy Journal 108 (3): 1155–67. https://doi.org/10.2134/agronj2015.0512.
	Palmer et al (2013)	3		Palmer, Mike W., Julia Cooper, Catherine Tétard-Jones, Dominika Średnicka-Tober, Marcin Barański, Mick Eyre, Peter N. Shotton, et al. 2013. “The Influence of Organic and Conventional Fertilisation and Crop Protection Practices, Preceding Crop, Harvest Year and Weather Conditions on Yield and Quality of Potato (Solanum Tuberosum) in a Long-Term Management Trial.” European Journal of Agronomy 49 (A…
